# Supplementary material for: Characterization of Flavor Compounds in Distilled Spirits: Developing a Versatile Analytical Method Suitable for Micro-Distilleries
Source: MDPI journal article supplement (doi:10.3390/foods11213358), 2022-10-25
Supplement: s1 [file s1]

## Supplementary Material

**Table S1:** Selected LLE conditions for the extraction of distilled spirits

| Reference | Samples      | Solvent                                                       | Salt                            |         | Number of extractions |
|-----------|--------------|---------------------------------------------------------------|---------------------------------|---------|-----------------------|
|           |              |                                                               | Type                            | % (w/v) |                       |
| [1]       | Brandy       | CH <sub>2</sub> Cl <sub>2</sub>                               | NaCl                            | 5.1     | 1                     |
| [2]       | Tsipouro     | CH <sub>2</sub> Cl <sub>2</sub>                               | NaCl                            | 3.3     | 1                     |
| [3]       | Tequila      | CH <sub>2</sub> Cl <sub>2</sub>                               | -                               | -       | 2                     |
| [4]       | Whiskey      | CH <sub>2</sub> Cl <sub>2</sub>                               | Na <sub>2</sub> SO <sub>4</sub> | 10      | 2                     |
| [5]       | Whiskey      | CH <sub>2</sub> Cl <sub>2</sub>                               | -                               | -       | 3                     |
| [6]       | Cognac       | Pentane/CH <sub>2</sub> Cl <sub>2</sub> 50:50                 | NaCl                            | 10      | 1                     |
| [7]       | Rum          | Pentane/Et <sub>2</sub> O 50:50                               | NaCl                            | 18      | 3                     |
| [8]       | Brandy       | Pentane/Et <sub>2</sub> O 70:30<br>x2, then Et <sub>2</sub> O | NaCl                            | 26.7    | 3                     |
| [9]       | Rum          | Et <sub>2</sub> O                                             | -                               | -       | 3                     |
| [10]      | Cachaça, rum | Freon 113 +<br>ultrasound                                     | -                               | -       | 2                     |

**Table S2:** Selected SPE conditions for the extraction of distilled spirits

| Reference | Phase                                                     | Elution solvent                              |
|-----------|-----------------------------------------------------------|----------------------------------------------|
| [11]      | C <sub>18</sub>                                           | CH <sub>2</sub> Cl <sub>2</sub>              |
| [12]      | C <sub>18</sub>                                           | CH <sub>2</sub> Cl <sub>2</sub> /pentane 1:2 |
| [13]      | C <sub>18</sub>                                           | CH <sub>2</sub> Cl <sub>2</sub>              |
| [14]      | C <sub>18</sub>                                           | MeOH                                         |
| [15]      | Ethylvinylbenzene-divinylbenzene copolymer (LiChrolut EN) | CH <sub>2</sub> Cl <sub>2</sub>              |
| [16]      | Ethylvinylbenzene-divinylbenzene copolymer (LiChrolut EN) | CH <sub>2</sub> Cl <sub>2</sub>              |
| [17]      | Ethylvinylbenzene-divinylbenzene copolymer (LiChrolut EN) | CH <sub>2</sub> Cl <sub>2</sub>              |
| [18]      | N-vinylpyrrolidone-divinylbenzene copolymer (HLB)         | Ethyl acetate/isooctane 80:20                |

**Table S3:** Selected SPME conditions for the extraction of distilled spirits

| Reference | Samples                                                    | %EtOH<br>(v/v) | %NaCl<br>(w/v) | Fiber                 | T (°C) | Time<br>(min) |
|-----------|------------------------------------------------------------|----------------|----------------|-----------------------|--------|---------------|
| [19]      | Rum                                                        | 12             | 18             | PDMS                  | 30     | 35            |
| [20]      | Rum                                                        | 12             | 20             | PDMS                  | 30     | 35            |
| [21]      | Rum                                                        | -              | -              | PDMS                  | 65     | 30            |
| [22]      | Whiskey                                                    | 40             | 15             | PDMS,<br>DVB/CAR/PDMS | 25     | 30            |
| [23]      | Whiskey                                                    | 12             | 30             | CAR/PDMS              | 40     | 60            |
| [24]      | Whiskey                                                    | 13             | 30             | CAR/PDMS              | 40     | 60            |
| [25]      | Gin                                                        | 10             | -              | DVB/CAR/PDMS          | 50     | 30            |
| [26]      | Grain alcohol                                              | 20             | -              | DVB/CAR/PDMS          | 40     | 40            |
| [27]      | Rum, pear brandy,<br>whiskey, vodka, grappa,<br>egg liquor | -              | -              | DVB/CAR/PDMS          | 30     | 5             |
| [28]      | Banana terra spirit                                        | 3              | 25             | DVB/CAR/PDMS          | 60     | 25            |
| [29]      | Gin, brandy, rum,<br>vodka, whiskey, Chinese<br>liquor     | 10             | 2              | DVB/CAR/PDMS          | 50     | 15            |
| [30]      | Whiskey                                                    | 20             | -              | PA                    | 37     | 50            |
| [31]      | Cachaça, gin, vodka,<br>whiskey, tequila                   | 3              | 5              | PA                    | 60     | 25            |
| [32]      | Mezcal                                                     | -              | -              | CW/DVB                | 25     | 60            |

**Table S4:** Selected SBSE conditions for the extraction of distilled spirits

| Reference | Samples           | %EtOH<br>(v/v) | %NaCl<br>(w/v) | Phase | T (°C) | Time<br>(min) |
|-----------|-------------------|----------------|----------------|-------|--------|---------------|
| [33]      | Whiskey           | 40             | -              | PDMS  | 25     | 30            |
| [34]      | Chinese<br>liquor | 10             | 20             | PDMS  | 25     | 90            |
| [35]      | Sherry            | 20             | -              | PDMS  | 25     | 100           |

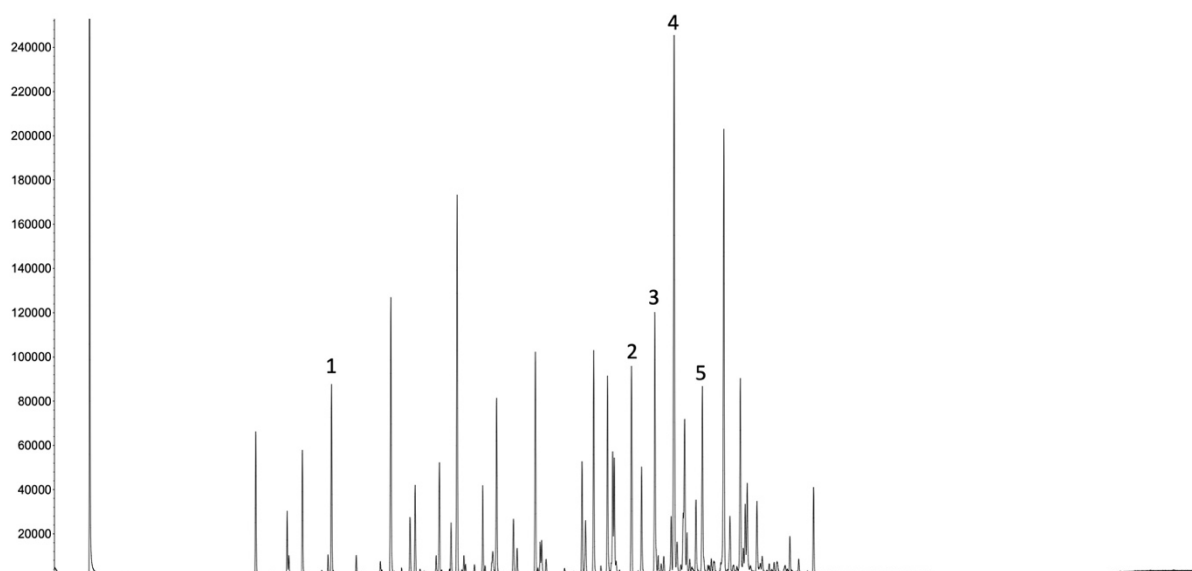

**Figure S1:** TIC chromatogram of 44°N gin (1 $\mu$ L, split 1:10): limonene **1**,  $\beta$ -caryophyllene **2**,  $\alpha$ -humulene **3**,  $\gamma$ -muurolene **4**,  $\delta$ -cadinene **5**

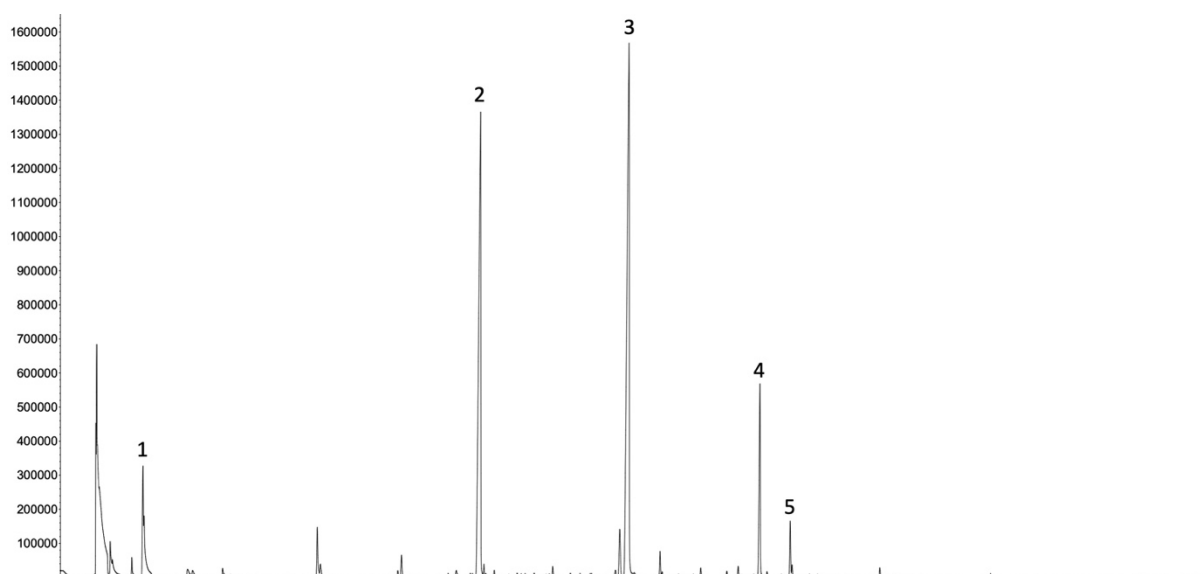

**Figure S2:** TIC chromatogram of Glenfiddich whiskey (1 $\mu$ L, split 1:10): 3-methyl-1-butanol **1**, ethyl octanoate **2**, 2-phenylethyl acetate **3**, ethyl decanoate **4**, ethyl dodecanoate **5**

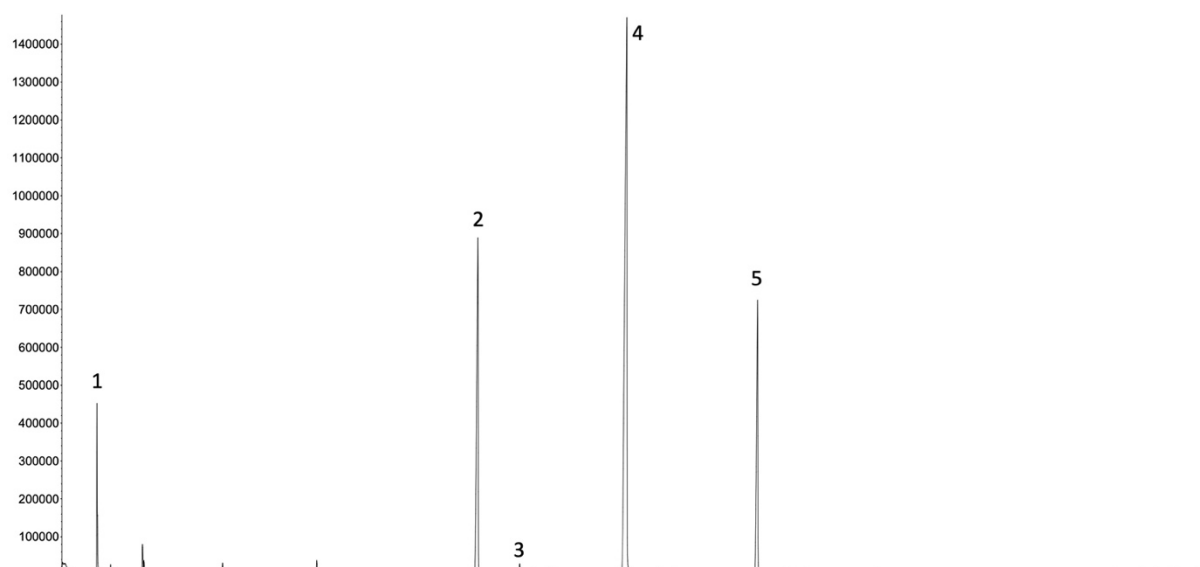

**Figure S3:** TIC chromatogram of Diplomatico rum (1 $\mu$ L, splitless): 3-methyl-1-butanol **1**, ethyl octanoate **2**, ethyl decanoate **3**, ethyl dodecanoate **4**, 3-methylbutyl decanoate **5**

**Table S5:** Most abundant m/z of unknown compounds with no identified chemical class in gin, whiskey and rum

| Compound   | Most abundant m/z (relative abundance %)                                                          |
|------------|---------------------------------------------------------------------------------------------------|
| unknown 1  | 57(100); 56(99); 41(66); 39(8); 70(8); 58(6); 59(4); 53(3); 38(2); 51(2)                          |
| unknown 2  | 193(100); 209(44); 194(19); 195(15); 97(10); 135(10); 179(9); 210(8); 211(7); 165(5)              |
| unknown 6  | 91(100); 119(100); 93(75); 180(74); 41(66); 109(64); 81(64); 107(54); 134(53); 121(53);           |
| unknown 7  | 96(100); 55(99); 81(75); 97(62); 95(61); 67(60); 41(59); 69(48); 110(47); 68(34); 184(14)         |
| unknown 9  | 157(100); 142(59); 141(39); 172(25); 115(23); 128(15); 158(11); 143(10); 155(9); 129(9); 170(4)   |
| unknown 12 | 79(100); 41(70); 96(67); 109(52); 123(51); 93(49); 91(48); 81(45); 95(44); 107(43); 235(2)        |
| unknown 13 | 131(100); 123(99); 91(87); 105(68); 124(66); 159(56); 109(54); 145(51); 119(44); 146(42); 220(88) |
| unknown 15 | 93(100); 69(90); 41(78); 107(55); 91(48); 119(41); 55(40); 105(38); 161(36); 67(35); 204(13)      |
| unknown 21 | 157(100); 142(55); 172(42); 128(32); 141(30); 115(28); 129(24); 132(21); 158(20); 143(18); 218(5) |
| unknown 22 | 187(100); 123(84); 202(82); 159(63); 91(58); 109(51); 124(47); 131(42); 93(41); 41(40); 341(16)   |
| unknown 25 | 69(100); 81(83); 41(74); 67(53); 95(51); 123(48); 55(43); 57(36); 91(36); 43(32); 181(18)         |

- [1] J. Ledauphin *et al.*, "Identification of Trace Volatile Compounds in Freshly Distilled Calvados and Cognac Using Preparative Separations Coupled with Gas Chromatography–Mass Spectrometry," *J. Agric. Food Chem.*, vol. 52, no. 16, pp. 5124–5134, Aug. 2004, doi: 10.1021/jf040052y.
- [2] A. A. Apostolopoulou, A. I. Flouros, P. G. Demertzis, and K. Akrida-Demertzi, "Differences in concentration of principal volatile constituents in traditional Greek distillates," *Food Control*, vol. 16, no. 2, pp. 157–164, Feb. 2005, doi: 10.1016/j.foodcont.2004.01.005.

- [3] O. Aguilar-Méndez *et al.*, "Volatile compound profile conferred to tequila beverage by maturation in recycled and regenerated white oak barrels from *Quercus alba*," *Eur. Food Res. Technol.*, vol. 243, no. 12, pp. 2073–2082, Dec. 2017, doi: 10.1007/s00217-017-2901-7.
- [4] M. Caldeira, F. Rodrigues, R. Perestrelo, J. C. Marques, and J. S. Câmara, "Comparison of two extraction methods for evaluation of volatile constituents patterns in commercial whiskeys Elucidation of the main odour-active compounds," *Talanta*, vol. 74, no. 1, pp. 78–90, Nov. 2007, doi: 10.1016/j.talanta.2007.05.029.
- [5] A. Wanikawa, K. Hosoi, T. Kato, and K. Nakagawa, "Identification of green note compounds in malt whisky using multidimensional gas chromatography," *Flavour Fragr. J.*, vol. 17, no. 3, pp. 207–211, May 2002, doi: 10.1002/ffj.1073.
- [6] P. Awad *et al.*, "Evolution of Volatile Compounds during the Distillation of Cognac Spirit," *J. Agric. Food Chem.*, vol. 65, no. 35, pp. 7736–7748, Sep. 2017, doi: 10.1021/acs.jafc.7b02406.
- [7] J. A. Pino, S. Tolle, R. Gök, and P. Winterhalter, "Characterisation of odour-active compounds in aged rum," *Food Chem.*, vol. 132, no. 3, pp. 1436–1441, Jun. 2012, doi: 10.1016/j.foodchem.2011.11.133.
- [8] J. Ledauphin, C. Le Milbeau, D. Barillier, and D. Hennequin, "Differences in the Volatile Compositions of French Labeled Brandies (Armagnac, Calvados, Cognac, and Mirabelle) Using GC-MS and PLS-DA," *J. Agric. Food Chem.*, vol. 58, no. 13, pp. 7782–7793, Jul. 2010, doi: 10.1021/jf9045667.
- [9] L. Franitza, M. Granvogl, and P. Schieberle, "Characterization of the Key Aroma Compounds in Two Commercial Rums by Means of the Sensomics Approach," *J. Agric. Food Chem.*, vol. 64, no. 3, pp. 637–645, Jan. 2016, doi: 10.1021/acs.jafc.5b05426.
- [10] M. D. C. A. de Souza, P. Vásquez, N. L. del Mastro, T. E. Acree, and E. H. Lavin, "Characterization of Cachaça and Rum Aroma," *J. Agric. Food Chem.*, vol. 54, no. 2, pp. 485–488, Jan. 2006, doi: 10.1021/jf0511190.
- [11] I. Lukić, M. Banović, Đ. Peršurić, S. Radeka, and B. Sladonja, "Determination of volatile compounds in grape distillates by solid-phase extraction and gas chromatography," *J. Chromatogr. A*, vol. 1101, no. 1–2, pp. 238–244, Jan. 2006, doi: 10.1016/j.chroma.2005.09.057.
- [12] S. C. Diéguez, Ma. L. G. de la Peña, and E. F. Gómez, "Approaches to Spirit Aroma: Contribution of Some Aromatic Compounds to the Primary Aroma in Samples of *Orujo* Spirits," *J. Agric. Food Chem.*, vol. 51, no. 25, pp. 7385–7390, Dec. 2003, doi: 10.1021/jf0302916.
- [13] A. C. Garcia, F. A. T. Serafim, D. D. Keukeleire, and D. W. Franco, "Evaluation of Glycerol Profiles in Sugarcane Spirits (Cachaças)," *J. Braz. Chem. Soc.*, 2014, doi: 10.5935/0103-5053.20140213.
- [14] L. M. Zacaroni *et al.*, "Determination of Phenolic Compounds and Coumarins in Sugar Cane Spirit Aged in Different Species of Wood," *Anal. Lett.*, vol. 44, no. 12, pp. 2061–2073, Aug. 2011, doi: 10.1080/00032719.2010.546017.
- [15] E. Campo, J. Cacho, and V. Ferreira, "Solid phase extraction, multidimensional gas chromatography mass spectrometry determination of four novel aroma powerful ethyl esters," *J. Chromatogr. A*, vol. 1140, no. 1–2, pp. 180–188, Jan. 2007, doi: 10.1016/j.chroma.2006.11.036.
- [16] E. Boothroyd, R. S. T. Linforth, F. Jack, and D. J. Cook, "Origins of the perceived nutty character of new-make malt whisky spirit: Nutty aroma of new make malt spirit," *J. Inst. Brew.*, vol. 120, no. 1, pp. 16–22, Jan. 2014, doi: 10.1002/jib.103.

- [17] I. W. González-Robles and D. J. Cook, "The impact of maturation on concentrations of key odour active compounds which determine the aroma of tequila: Key odour active compounds which determine the aroma of tequila," *J. Inst. Brew.*, vol. 122, no. 3, pp. 369–380, Jul. 2016, doi: 10.1002/jib.333.
- [18] P. Alberts, M. A. Stander, and A. De Villiers, "Development of a novel solid-phase extraction, LC-MS/MS method for the analysis of ethyl carbamate in alcoholic beverages: application to South African wine and spirits," *Food Addit. Contam. Part A*, vol. 28, no. 7, pp. 826–839, Jul. 2011, doi: 10.1080/19440049.2011.568010.
- [19] J. A. Pino, "Characterization of rum using solid-phase microextraction with gas chromatography–mass spectrometry," *Food Chem.*, vol. 104, no. 1, pp. 421–428, Jan. 2007, doi: 10.1016/j.foodchem.2006.09.031.
- [20] C. Da Porto, D. Decorti, and F. Tubaro, "Evaluation of volatile compounds and antioxidant capacity of some commercial rums from Dominican republic: Evaluation of volatile compounds and antioxidant capacity," *Int. J. Food Sci. Technol.*, vol. 46, no. 5, pp. 988–993, May 2011, doi: 10.1111/j.1365-2621.2011.02597.x.
- [21] J. R. Belmonte-Sánchez *et al.*, "Rum classification using fingerprinting analysis of volatile fraction by headspace solid phase microextraction coupled to gas chromatography-mass spectrometry," *Talanta*, vol. 187, pp. 348–356, Sep. 2018, doi: 10.1016/j.talanta.2018.05.025.
- [22] J. Demyttenaere, J. Sanchezmartinez, R. Verhe, P. Sandra, and N. Dekimpe, "Analysis of volatiles of malt whisky by solid-phase microextraction and stir bar sorptive extraction," *J. Chromatogr. A*, vol. 985, no. 1–2, pp. 221–232, Jan. 2003, doi: 10.1016/S0021-9673(02)01471-1.
- [23] M. Caldeira, F. Rodrigues, R. Perestrelo, J. C. Marques, and J. S. Câmara, "Comparison of two extraction methods for evaluation of volatile constituents patterns in commercial whiskeys: Elucidation of the main odour-active compounds," *Talanta*, vol. 74, no. 1, pp. 78–90, Nov. 2007, doi: 10.1016/j.talanta.2007.05.029.
- [24] J. S. Câmara *et al.*, "Comparative study of the whisky aroma profile based on headspace solid phase microextraction using different fibre coatings," *J. Chromatogr. A*, vol. 1150, no. 1–2, pp. 198–207, May 2007, doi: 10.1016/j.chroma.2006.09.014.
- [25] S. Vichi, M. Riu-Aumatell, M. Mora-Pons, S. Buxaderas, and E. López-Tamames, "Characterization of Volatiles in Different Dry Gins," *J. Agric. Food Chem.*, vol. 53, no. 26, pp. 10154–10160, Dec. 2005, doi: 10.1021/jf058121b.
- [26] P. Biernacka and W. Wardencki, "Volatile composition of raw spirits of different botanical origin: Volatile composition of raw spirits," *J. Inst. Brew.*, vol. 118, no. 4, pp. 393–400, Dec. 2012, doi: 10.1002/jib.55.
- [27] M. Stupak, V. Kocourek, I. Kolouchova, and J. Hajslova, "Rapid approach for the determination of alcoholic strength and overall quality check of various spirit drinks and wines using GC–MS," *Food Control*, vol. 80, pp. 307–313, Oct. 2017, doi: 10.1016/j.foodcont.2017.05.008.
- [28] M. Capobianco, R. B. Mastello, S.-T. Chin, E. de S. Oliveira, Z. de L. Cardeal, and P. J. Marriott, "Identification of aroma-active volatiles in banana Terra spirit using multidimensional gas chromatography with simultaneous mass spectrometry and olfactometry detection," *J. Chromatogr. A*, vol. 1388, pp. 227–235, Apr. 2015, doi: 10.1016/j.chroma.2015.02.029.
- [29] Y. P. Zhao, X. P. Zheng, P. Song, Z. L. Sun, and T. T. Tian, "Characterization of Volatiles in the Six Most Well-Known Distilled Spirits," *J. Am. Soc. Brew. Chem.*, vol. 71, no. 3, pp. 161–169, Jun. 2013, doi: 10.1094/ASBCJ-2013-0625-01.

- [30] J. V. Leland, P. Schieberle, A. Buettner, and T. E. Acree, Eds., *Gas Chromatography-Olfactometry: The State of the Art*, vol. 782. Washington, DC: American Chemical Society, 2001. doi: 10.1021/bk-2001-0782.
- [31] Z. L. Cardeal and P. J. Marriott, "Comprehensive two-dimensional gas chromatography-mass spectrometry analysis and comparison of volatile organic compounds in Brazilian cachaça and selected spirits," *Food Chem.*, vol. 112, no. 3, pp. 747–755, Feb. 2009, doi: 10.1016/j.foodchem.2008.06.057.
- [32] A. De León-Rodríguez, L. González-Hernández, A. P. Barba de la Rosa, P. Escalante-Minakata, and M. G. López, "Characterization of Volatile Compounds of Mezcal, an Ethnic Alcoholic Beverage Obtained from *Agave salmiana*," *J. Agric. Food Chem.*, vol. 54, no. 4, pp. 1337–1341, Feb. 2006, doi: 10.1021/jf052154+.
- [33] J. Demyttenaere, J. Sanchezmartinez, R. Verhe, P. Sandra, and N. Dekimpe, "Analysis of volatiles of malt whisky by solid-phase microextraction and stir bar sorptive extraction," *J. Chromatogr. A*, vol. 985, no. 1–2, pp. 221–232, Jan. 2003, doi: 10.1016/S0021-9673(02)01471-1.
- [34] Y. Niu, D. Yu, Z. Xiao, J. Zhu, S. Song, and G. Zhu, "Use of Stir Bar Sorptive Extraction and Thermal Desorption for Gas Chromatography-Mass Spectrometry Characterization of Selected Volatile Compounds in Chinese Liquors," *Food Anal. Methods*, vol. 8, no. 7, pp. 1771–1784, Aug. 2015, doi: 10.1007/s12161-014-0060-z.
- [35] R. Delgado, E. Durán, R. Castro, R. Natera, and C. G. Barroso, "Development of a stir bar sorptive extraction method coupled to gas chromatography-mass spectrometry for the analysis of volatile compounds in Sherry brandy," *Anal. Chim. Acta*, vol. 672, no. 1–2, pp. 130–136, Jul. 2010, doi: 10.1016/j.aca.2010.05.015.
